# Supplementary material
Source: PubMed Central journal article supplement (PMC6584253)
Supplement: jamasurg-154-530-s001.pdf [file jamasurg-154-530-s001.pdf]

## Supplementary Online Content

Jørgensen SL, Mogensen O, Wu C et al. Nationwide introduction of minimally invasive robotic surgery for early-stage endometrial cancer and its association with severe complications. *JAMA Surg*. Published online February 27, 2019. doi:10.1001/jamasurg.2018.5840

**eFigure.** Centralization and MIRS Introduction in Early-Stage Endometrial Cancer Treatment in Denmark

This supplementary material has been provided by the authors to give readers additional information about their work.

**eFigure.** Centralization and MIRS Introduction in Early-Stage Endometrial Cancer Treatment in Denmark

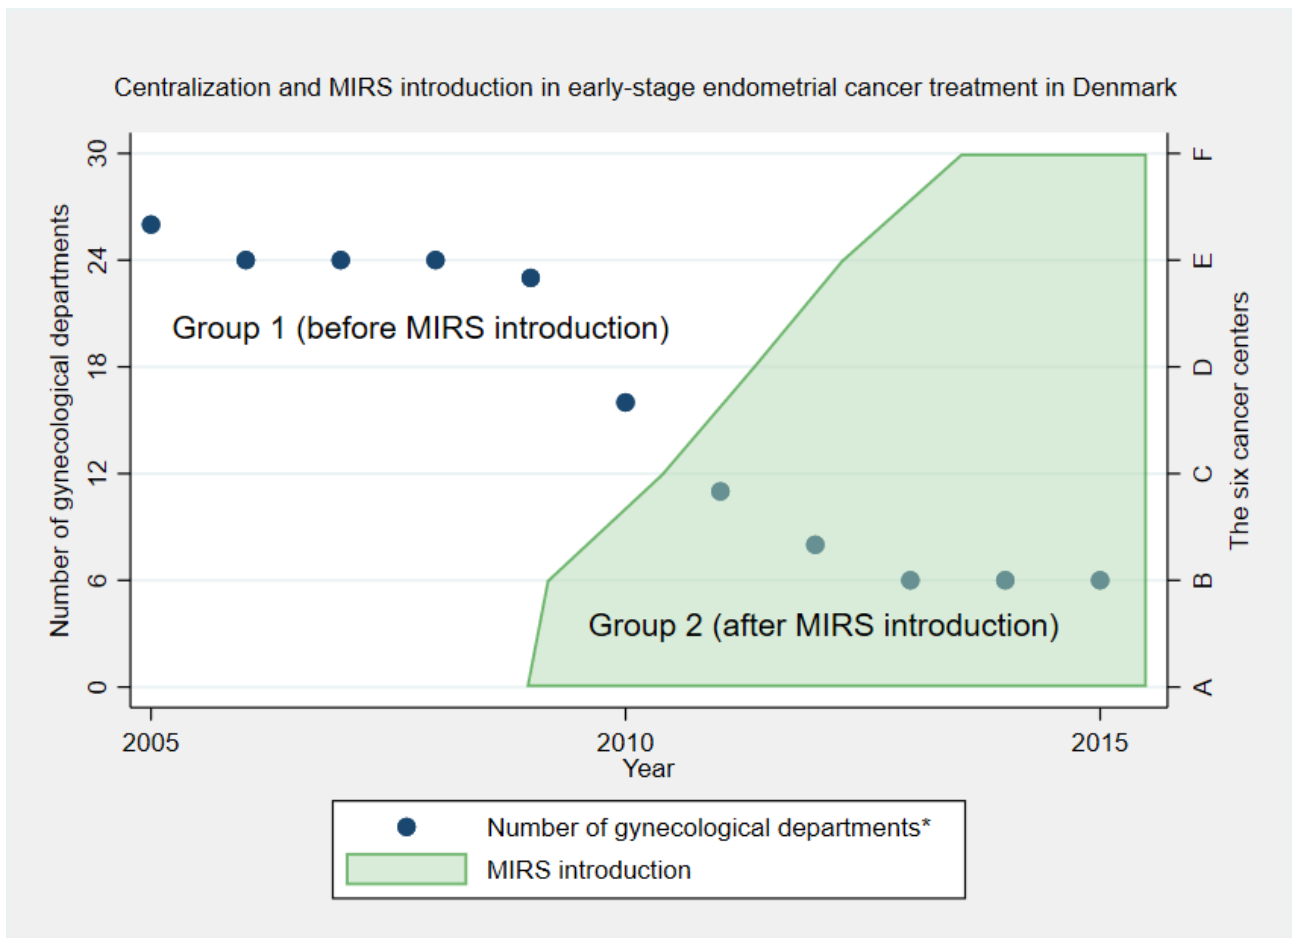

Abbreviation: MIRS, minimally invasive robotic surgery.

\*Gynecological departments providing surgery for more than 3 women with early-stage endometrial cancer per year
